1 **Title**

2 Risk factors for pneumococcal carriage in adults living with HIV on antiretroviral therapy in the  
3 infant pneumococcal vaccine era in Malawi.

4

5 **Authors**

6 Deus Thindwa<sup>1,2\*</sup>, Thandie S Mwalukomo<sup>3</sup>, Jacqueline Msefula<sup>2</sup>, Kondwani C Jambo<sup>2,4</sup>, Comfort  
7 Brown<sup>2</sup>, Arox Kamng'ona<sup>3</sup>, Charles Mwansambo<sup>5</sup>, John Ojal<sup>1,6</sup>, Stefan Flasche<sup>1</sup>, Neil French<sup>7</sup>, Robert  
8 S Heyderman<sup>8</sup>, Todd D Swarthout<sup>2,8</sup>.

9

10 <sup>1</sup> Centre for the Mathematical Modelling of Infectious Diseases, Department of Infectious Disease  
11 Epidemiology, London School of Hygiene and Tropical Medicine, London, UK.

12 <sup>2</sup> Malawi-Liverpool-Wellcome Programme, Blantyre, Malawi.

13 <sup>3</sup> School of Life Sciences and Allied Health Professions, Department of Biomedical Sciences,  
14 Kamuzu University of Health Sciences, Blantyre, Malawi.

15 <sup>4</sup> Department of Clinical Sciences, Liverpool School of Tropical Medicine, Liverpool, UK.

16 <sup>5</sup> Ministry of Health of Malawi, Lilongwe, Malawi

17 <sup>6</sup> KEMRI-Wellcome Research Programme, Geographic Medicine Centre, Kilifi, Kenya.

18 <sup>7</sup> Institute of Infection, Veterinary and Ecological Science, Department of Clinical Infection,  
19 Microbiology, and Immunology, University of Liverpool, Liverpool, UK.

20 <sup>8</sup> NIHR Mucosal Pathogens Research Unit, Research Department of Infection, Division of Infection  
21 and Immunity, University College London, London, United Kingdom

22

23 Corresponding author

24 \*Email: [deus.thindwa@lshtm.ac.uk](mailto:deus.thindwa@lshtm.ac.uk)

25 Phone: +265997788370

26

27 **Abstract**

28 **Objective**

29 Adults living with HIV (ALWHIV) on antiretroviral therapy (ART) are at high risk of pneumococcal  
30 carriage and disease. To help evaluate carriage risk in African ALWHIV in the infant pneumococcal  
31 conjugate vaccination era, we assessed association between carriage and potential risk factors.

32  
33 **Methods**

34 Nasopharyngeal swabs were collected from adults aged 18-40 years attending an ART clinic during  
35 rolling, cross-sectional surveys in Blantyre, Malawi between 2015-2019. We fitted generalised  
36 additive models to estimate the risk of sex, social economic status (SES), living with a child <5y, and  
37 ART duration on carriage.

38  
39 **Results**

40 Of 2,067 adults, median age was 33y (range 28-37), 1,427 (69.0%) were females, 1,087 (61.4%) were  
41 in low-middle socio-economic-status (SES), 910 (44.0%) were living with a child <5y, and median  
42 ART duration was 3.0 years (range 0.004-17). We estimated 38.2% and 60.6% reductions in overall  
43 and vaccine-serotype carriage prevalence. Overall carriage was associated with low SES, living with a  
44 child <5y and shorter duration on ART. By contrast, vaccine-type carriage was associated with living  
45 without a child <5y and male sex.

46  
47 **Conclusion**

48 Despite temporal reductions in overall and vaccine-serotype carriage, there is evidence of incomplete  
49 VT indirect protection. A targeted-vaccination campaign should be considered for ALWHIV, along  
50 with other public health measures to further reduce vaccine-serotype carriage and therefore disease.

51  
52 **Key words:** Pneumococcal carriage, pneumococcal conjugate vaccine, human immunodeficiency  
53 virus, herd immunity, antiretroviral, risk factors, Malawi

## 54 **Introduction**

55 *Streptococcus pneumoniae* (the pneumococcus) is a common coloniser of the human nasopharynx,  
56 particularly in young children and populations with human immunodeficiency virus (HIV) <sup>1</sup>.  
57 Pneumococcal colonisation is a necessary prerequisite for transmission and the development of  
58 disease, including otitis media, sinusitis, pneumonia, meningitis, and bacteraemia <sup>2</sup>. The  
59 pneumococcus is associated with a large burden of disease in adults living with HIV (ALWHIV)  
60 compared to adults without HIV <sup>3-5</sup>. Adult HIV prevalence remains high (>10%) in many sub-Saharan  
61 African countries, with Malawi reporting a national prevalence of 10.6% <sup>6-8</sup>. The use of antiretroviral  
62 therapy (ART) has substantially increased survival and reduced the incidence of invasive  
63 pneumococcal disease (IPD) <sup>9</sup>. However, despite more than 85% of ALWHIV in Malawi receiving  
64 ART <sup>10-12</sup>, ALWHIV remain at greater risk of IPD than adults without HIV <sup>3</sup>.

65  
66 Pneumococcal conjugate vaccines (PCVs) are widely used in infant schedules in low- and middle-  
67 income countries (LMICs), generally targeting the most commonly invasive serotypes in this age  
68 group <sup>1</sup>. To date, in contrast to high-income settings, immunisation of vulnerable adults with  
69 pneumococcal vaccines has not been adopted in most LMICs <sup>13</sup>. In November 2011, Malawi  
70 introduced the 13-valent PCV (PCV13) into the national Expanded Program on Immunisation (EPI)  
71 using a three-primary-dose schedule without booster (3+0; one dose at 6, 10 and 14 weeks of age).  
72 Despite nearly 10 years of >80% PCV13 three-dose coverage among age-eligible children, there is  
73 evidence of a sub-optimal reduction in both vaccine-serotype (VT) carriage prevalence and VT-IPD  
74 incidence in children and ALWHIV in Malawi <sup>14-16</sup>. Similar evidence of residual VT carriage  
75 prevalence is also reported in the Gambia and Mozambique after 5 and 2 years of implementation,  
76 respectively, <sup>17</sup> despite both countries also reporting >80% PCV three-dose coverage under a 3+0  
77 vaccine schedule <sup>18,19</sup>. There is increasing evidence that the indirect protection (i.e. herd immunity)  
78 offered by an infant PCV against VT carriage, especially in ALWHIV, is sub-optimal <sup>14,18</sup>.

79

80 The most effective strategy to reduce residual VT-IPD burden in ALWHIV depends on the factors  
81 shaping VT carriage and disease risk. Before introducing infant PCV in Malawi and South Africa, risk  
82 factors for IPD in ALWHIV included younger age, female sex, cotrimoxazole resistance, underlying  
83 medical conditions and living in a densely populated area<sup>3,4</sup>. On the other hand, risk factors for  
84 carriage of any pneumococcal serotype included exposure to infants exposed to HIV<sup>20,21</sup>, low socio-  
85 economic status (SES), high density living in housing with inadequate ventilation and with intense  
86 social contacts<sup>22-25</sup>. Moreover, among Malawian ALWHIV, the overall (VT and non-VT [NVT])  
87 carriage prevalence was found to be higher in those on ART than not on ART<sup>26,27</sup>.

88

89 In the PCV era, however, there are important information gaps in our understanding of the relative  
90 importance of of key factors for pneumococcal carriage and disease among ALWHIV. These include  
91 duration on ART, PCV vaccination status among children in the household, and SES. Following our  
92 recent data from Blantyre, Malawi showing high residual VT carriage and its determinants in PCV13-  
93 vaccinated and unvaccinated children and in ALWHIV<sup>15,16</sup>, we extend the analysis to identify age-  
94 and time-dependent risk factors for pneumococcal carriage in ALWHIV on ART using generalised  
95 additive modelling.

96

## 97 **Methods**

### 98 **Study design**

99 Blantyre is located in the southern region of Malawi spanning 2,025 km<sup>2</sup>, with an urban (population  
100 density 3,334/km<sup>2</sup>) and rural (253/km<sup>2</sup>) population of approximately 800,000 and 451,000 people,  
101 respectively.<sup>28</sup> As described elsewhere in more detail<sup>15</sup>, rolling, prospective cross-sectional  
102 pneumococcal nasopharyngeal (NP) carriage surveys were conducted between 29 June 2015 and 9  
103 August 2019 in Blantyre to investigate the change over time of pneumococcal colonisation in  
104 ALWHIV on ART. The majority (98.6%) of sampled individuals were on a first line ART regimen  
105 containing either i) Zidovudine, Lamivudine and Efavirenz, ii) Tenofovir, Lamivudine and Efavirenz  
106 or iii) Tenofovir, Lamivudine and Nevirapine<sup>29</sup>. Eight pneumococcal carriage surveys (each

107 approximately 6 months in duration) were conducted from 3.6 to 7.9 years after infant PCV13  
108 introduction into the EPI schedule. ALWHIV aged 18-40 years were recruited from the Queen  
109 Elizabeth Central Hospital (QECH) ART clinic in Blantyre using a systematic sampling approach.  
110 Exclusion from the study included being currently on treatment for tuberculosis, hospitalisation within  
111 two weeks of recruitment and previously enrolled in the survey.

112

### 113 **Nasopharyngeal sample collection and processing**

114 An NP swab sample was collected from each participant and processed at the Malawi-Liverpool-  
115 Wellcome Programme laboratory, co-located to QECH, to ascertain the presence of pneumococci.  
116 Samples were collected and processed according to World Health Organisation guidelines<sup>30</sup>.  
117 Serotyping was done using latex agglutination, based on picking a single colony, to identify serotypes  
118 targeted by PCV13 (1, 3, 4, 5, 6A, 6B, 7F, 9V, 14, 18C, 19A, 19F, 23F). Non-typeable and NVT  
119 isolates were both classified as NVT. Pneumococcal carriage dynamics were further evaluated using  
120 DNA microarray techniques, a technique which, in the case of co-carriage of multiple pneumococcal  
121 serotypes, differentiates all individual serotypes and reports relative abundance of each serotype in  
122 carriage<sup>31,32</sup>. Microarray was implemented only in surveys 1 through 4 and with samples having  
123 latex-confirmed pneumococcal carriage. Further details of sample processing has been reported earlier  
124 <sup>15,32</sup>.

125

### 126 **Data collection and analysis**

127 Participant data collected at recruitment included age, sex, cohabitation with a child <5y (Yes/No),  
128 social economic status (SES), duration of ART use, CD4+ T-cell count, current ART regimen and  
129 cotrimoxazole use. A multiple imputation random forest-based method, using MissForest R package  
130 <sup>34</sup>, was conducted to impute 1 (0.0005%), 297 (14.4%), and 537 (26.0%) missing data points on  
131 cohabitation with a child <5y, SES, and duration of ART use, respectively. Though reported in the  
132 descriptive analysis, CD4+ cell count was excluded from model-based analyses because 46.0% of its  
133 data points were missing, a proportion above the acceptable standard threshold for imputation<sup>34</sup>.

134 Duration on ART was not used as a continuous variable because of data sparsity in age- or time-  
135 stratified analyses but was categorised as short (<3 years) or long ( $\geq 3$  years) duration based on (1) a  
136 previous study in rural Malawi which showed strong evidence of high pneumococcal carriage during  
137 the first 2 years of ART use <sup>26</sup>, and (2) the median value of ART duration in this study.

138

139 Individual fitted carriage prevalence estimates were categorised into 18-24y, 25-29y, 30-34y, and 35-  
140 40y age groups reflecting their distinct IPD incidence <sup>3</sup>. Time was stratified into year of survey  
141 initiation (2015, 2016, 2017, 2018 and 2019). In Malawi, pneumococcal carriage prevalence is usually  
142 higher in the cold (May-August) and hot (September-November) seasons as compared to the rainy  
143 season (December-April) <sup>26</sup>. Thus, seasonality in carriage was captured using an indicator variable  
144 with values ranging from January to December based on the month of NP sample collection.

145

#### 146 **Generalised additive modelling framework**

147 We used a generalised additive modelling (GAM) framework to fit to age- and time-specific  
148 trajectories of pneumococcal carriage, and allow flexibility in capturing nonlinear carriage dynamics.  
149 In brief, we used penalised B splines (P-splines) for the age and time spline smoothers to avoid knot  
150 selections which usually introduce under- and over-fitting biases when trading-off model fit to the  
151 data and the smoothness of the curve <sup>35</sup>. A penalized log-likelihood maximization was used to fit a  
152 non-parametric binomial model with complementary log-log link function defined by log-hazard of  
153 carriage as a function of the risk factors and a spline in age and time. No time-series autocorrelation  
154 structure was included in the model fits because ALWHIV were independently sampled without  
155 replacement and with no evidence to suggest strong autocorrelation across time. Thus, the rolling,  
156 prospective cross-sectional carriage samples and model residuals were assumed to be serially  
157 independent.

158

## 159 **Age- and time-dependent carriage prevalence estimation**

160 We modelled age- and time-dependent carriage trajectories separately for overall (VT+NVT) and VT  
161 carriage as outcome variables for a set of potential risk factors. Due to reported poor immunogenicity  
162 and effectiveness of PCV13 against serotype 3<sup>36,37</sup>, we also modelled VT carriage without serotype 3  
163 (VT-st3) to explore changes in carriage prevalence. A model with age and time smoothers and  
164 potential risk factors including sex, seasonality, duration on ART, cohabitation with a child <5 years  
165 old, and SES were fitted to the carriage data to estimate the overall or VT carriage prevalence and risk  
166 factor-specific effects on carriage prevalence dynamics.

167

168 A ‘gam’ function in the ‘mgcv’ R package facilitated model fitting<sup>38</sup>, based on a model formulated as  
169  $g(P(Y_i = 1|a_i, t_i)) = g(\pi(a_i, t_i)) = \eta(a_i, t_i)$ , where  $Y_i$  is a binomial outcome on whether an  
170 individual  $i$  is carrying pneumococcus (1) or not (0);  $g$  is the complementary log-log link function;  
171  $\pi(a_i, t_i)$  is the carriage prevalence estimate for individuals of age ( $a_i$ ) at time ( $t_i$ );  $\eta(a_i, t_i)$  is a  
172 nonparametric linear predictor as function of individual age and time, and a set of risk factors. The  
173 linear predictor on a predictor scale is further expanded using the equation  
174  $\eta(a_i, t_i) = \beta_0 + \sum_k \beta_k G_k + te(a_i) + te(t_i)$ , where  $\beta_0$  is a model intercept,  $G_k$  refers to individual risk  
175 factor category,  $\beta_k$  is the risk factor coefficient,  $te(a_i)$  and  $te(t_i)$  denote tensor product P-spline of  
176 predictor age ( $a_i$ ) and time ( $t_i$ ).

177

178 The relative difference in carriage prevalence was computed by subtracting the GAM carriage  
179 prevalence estimate for each age or time category from the reference category and then dividing the  
180 difference by the reference category and then multiplying by 100%. The 95% confidence interval  
181 (95%CI) of the relative difference was estimated using

182  $(\rho + 1) * [1 \pm 1.96 * \sqrt{\delta_1^2 + \delta_2^2 - (1.96^2) * \delta_1^2 * \delta_2^2 / (1 - 1.96 * \delta_1^2)}] - 1$ , where  $\rho$  is the relative  
183 difference,  $\delta_1$  and  $\delta_2$  are the coefficient variations of the reference and comparator categories,  
184 respectively, and coefficient variation being standard deviation divided by the observed mean<sup>39</sup>.

185 GAMs with and without interactions between age group or time and each independent risk factor on

186 the overall and VT carriage prevalence were fitted and compared using Akaike information criterion  
187 (AIC), and results of these tests are numerically presented in S1 Table. Given the model  
188 complexities, sensitivity analyses assessed factors that may affect carriage estimates which included  
189 the impact on carriage of individual age group or survey, serotyping method, carriage autocorrection,  
190 model formulation and spline type. Detailed sensitivity methods and results are presented in  
191 Supplementary Material (S1 Text and S2 Text). Analyses were conducted in R v4.1.1<sup>40</sup>, with  
192 statistical significance set at  $p < 0.05$ , and the code is publicly shared via GitHub<sup>41</sup>.

193

## 194 **Ethical approval**

195 Ethical approval for this study was granted by the College of Medicine Research Ethics Committee,  
196 Kamuzu University of Health Sciences (P.02/15/1677), the Liverpool School of Tropical Medicine  
197 Research Ethics Committee (14.056) and the London School of hygiene and Tropical Medicine  
198 (26839). Individual written informed consent, including consent for publication, was obtained from  
199 each participant prior to study recruitment.

200

## 201 **Results**

### 202 **Descriptive analysis**

203 A total of 2,067 ALWHIV aged 18-40y were enrolled in the study between 29 June 2015 and 9  
204 August 2019. Among adults with non-missing data, 1,427 (69.0%, n=2,067) were females, 413  
205 (23.3%, n=1,770) and 674 (38.1%, n=1,770) were from low and middle SES households, respectively,  
206 1,156 (56.0%, n=2,066) were not living with a child <5y, 1,772 (98.5%, n=1,799) were on one of  
207 Malawi's first-line ART regimens, and 2,010 (97.2%, n=2,067) were using prophylactic  
208 cotrimoxazole at recruitment. The median age was 33y (IQR: 28-37, n=2,067), median CD4+ count  
209 was 252 cells/mm<sup>3</sup> (IQR: 138-443, n=1,117), and median duration on ART at the time of study  
210 recruitment was 3.0 years, (range: 0-17, n=1,530) (Fig. 1).

211



212 Using survey-aggregated data, serotype 3 comprised 77 (33.2%, n=232) of all VT serotypes  
213 identified. Survey-aggregated data showed that carriage prevalence was 552 (26.7%, n=2,067) for  
214 overall (VT+NVT) and 232 (11.2%, n=2,067) for VT. It also showed that overall and VT carriage  
215 prevalence was 537 (37.7%, n=1,427) and 155 (10.9%, n=1,427) among females, 247 (38.6%, n=640)  
216 and 77 (12.0%, = 640) among males, 195 (47.2%, n=413) and 59 (14.3%, n=413) in low SES, 276  
217 (40.9%, n=674) and 85 (12.6%, n=674) in middle SES and 243 (35.6%, n=683), 73 (10.7%, =683) in  
218 high SES households, 361 (39.7%, n=910) and 111 (12.2%, n=910) in adults living with a child <5y,  
219 423 (36.6%, n=1,156) and 121 (10.5%, n=1,156) in adults living without a child <5y, 682 (38.5%,  
220 n=1,778) and 199 (11.2%, n=1,778) in adults on a first-line ART regimen, 9 (33.3%, n=27) and 3  
221 (11.1%, n=27) in adults on second-line ART regimen, 767 (38.1%, n=2,010) and 228 (11.3%,  
222 n=2,010) in adults taking cotrimoxazole, 17 (29.8%, n=57) and 4 (7.0%, n=57) in adults not taking  
223 cotrimoxazole (Fig 1).

224

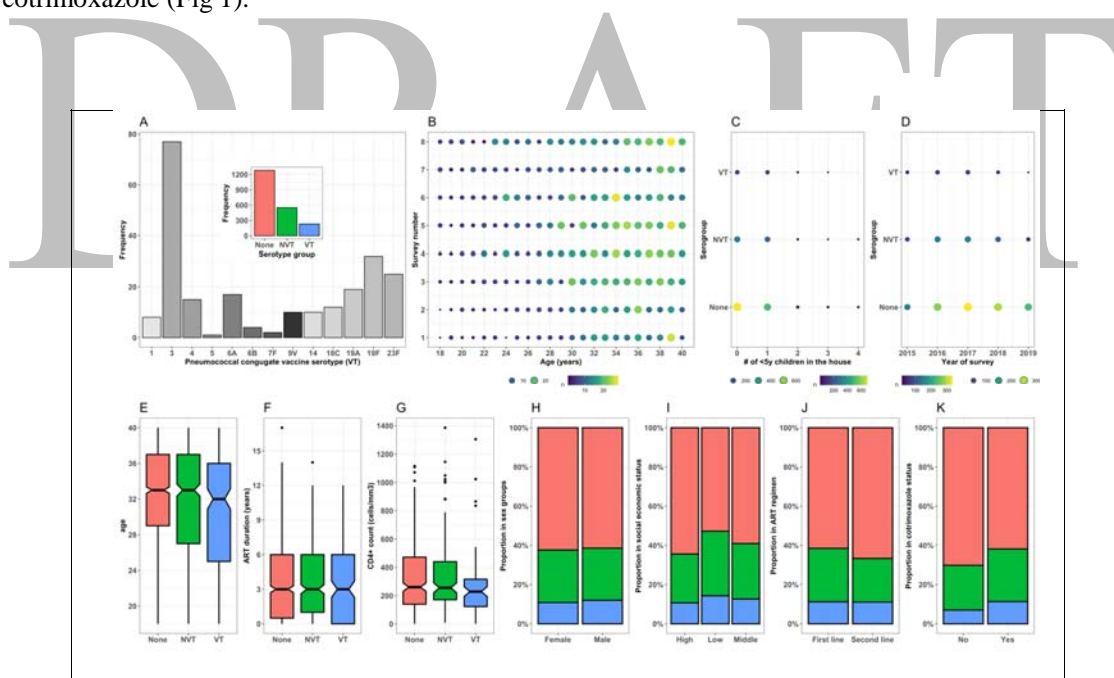

225

226 Figure 1. Demographics and clinical characteristics of participants using aggregated data across eight  
227 surveys. (A) Frequency of each VT in carriage; insert shows frequency of VT, NVT and no carriage.  
228 (B) Number of adults in each annual age per survey with circle size proportional to total sample size.  
229 The number of adults with VT, NVT, and no carriage living with (C) varying number of children <5  
230 years or (D) across survey years. Notched box plots by serotype group representing participant

231 distribution by (E) age, (F) duration on ART and (G) CD4+ count. Proportion of serotype group by  
 232 (H) sex, (I) social economic status, (J) ART regimen and (K) Cotrimoxazole use.

233

234 **Age- and time-dependent carriage prevalence estimates**

235 Our GAM predicted a significant reduction in overall and VT carriage prevalence with increasing age  
 236 and time. Among older age categories, overall carriage prevalence was lower than the reference  
 237 younger adults aged 18-24y, with greatest reduction in adults aged 30-34y (-22.8%, 95%CI -34.1, -  
 238 10.4). Likewise, VT carriage prevalence was lower in older than younger adults, with highest  
 239 reduction in adults aged 30-34y (-45.1%, 95%CI -61.8, -25.6). Across time, we estimated lower  
 240 overall (-38.2%, 95%CI -51.7, -23.6) and VT (-60.6%, 95%CI -79.1, -39.2) carriage prevalence in  
 241 2019 compared to 2015. In a sub-analysis, serotype 3 made up 22.6-34.7% (across age groups) and  
 242 18.9-38.2% (across time) of VT carriage prevalence (Table 1; Fig. 2).

243

Table 1. Age- and time-dependent overall and VT carriage prevalence, and relative difference in fitted carriage prevalence among ALWHIV on ART, 2015-2019 in Blantyre, Malawi.

|             | Observed overall carriage<br>n/N (%) | Modelled <sup>‡</sup> overall carriage prevalence<br>(95%CI) | Relative difference <sup>†</sup> in overall carriage<br>(95%CI) | Observed VT carriage<br>n/N (%) | Modelled <sup>‡</sup> VT carriage prevalence<br>(95%CI) | Relative difference <sup>†</sup> in VT carriage<br>(95%CI) |
|-------------|--------------------------------------|--------------------------------------------------------------|-----------------------------------------------------------------|---------------------------------|---------------------------------------------------------|------------------------------------------------------------|
| Age (years) |                                      |                                                              |                                                                 |                                 |                                                         |                                                            |
| 18-24       | 144/310 (46.5)                       | 49.2 (40.9, 58.0)                                            | Reference                                                       | 50/310 (16.1)                   | 19.5 (13.0, 28.6)                                       | Reference                                                  |
| 25-29       | 120/337 (35.6)                       | 40.0 (33.8, 46.8)                                            | <b>-18.7 (-32.3, -4.1)</b>                                      | 32/337 (9.5)                    | 12.4 (8.7, 17.6)                                        | <b>-36.4 (-58.0, -11.4)</b>                                |
| 30-34       | 213/585 (36.4)                       | 38.0 (32.1, 44.5)                                            | <b>-22.8 (-34.1, -10.4)</b>                                     | 63/585 (10.8)                   | 10.7 (7.4, 15.1)                                        | <b>-45.1 (-61.8, -25.6)</b>                                |
| 35-40       | 307/835 (36.8)                       | 38.0 (31.8, 45.0)                                            | <b>-22.8 (-33.3, -11.2)</b>                                     | 87/835 (10.4)                   | 11.8 (8.1, 17.1)                                        | <b>-39.4 (-55.9, -19.9)</b>                                |
| Year        |                                      |                                                              |                                                                 |                                 |                                                         |                                                            |
| 2015        | 114/265 (43.0)                       | 45.0 (37.4, 53.3)                                            | Reference                                                       | 40/265 (15.1)                   | 17.0 (11.4, 24.8)                                       | Reference                                                  |
| 2016        | 218/494 (44.1)                       | 44.7 (38.0, 52.0)                                            | -0.7 (-16.3, 16.8)                                              | 67/494 (13.6)                   | 15.3 (10.6, 21.8)                                       | -10.0 (-37.7, 24.4)                                        |
| 2017        | 226/561 (40.3)                       | 41.6 (35.2, 48.6)                                            | -7.6 (-22.1, 8.7)                                               | 69/561 (12.3)                   | 13.1 (9.1, 18.8)                                        | -22.9 (-46.9, 6.8)                                         |
| 2018        | 156/450 (34.7)                       | 34.8 (29.0, 41.3)                                            | <b>-22.7 (-36.2, -7.7)</b>                                      | 41/450 (9.1)                    | 8.8 (5.9, 12.9)                                         | <b>-48.2 (-67.3, -25.3)</b>                                |
| 2019        | 70/297 (23.6)                        | 27.8 (22.0, 34.6)                                            | <b>-38.2 (-51.7, -23.6)</b>                                     | 15/297 (5.1)                    | 6.7 (4.2, 10.6)                                         | <b>-60.6 (-79.1, -39.2)</b>                                |

‡ Carriage prevalence was modelled by fitting a GAM to individual carriage trajectories adjusting for risk factors as described in Methods

† Relative difference was computed by subtracting a GAM carriage prevalence estimate from the reference category and then dividing the difference by the reference category and then multiplying by 100%.

VT - PCV13 vaccine serotype.  
ALWHIV - adults living with human immunodeficiency virus.  
ART – Antiretroviral therapy  
95%CI - 95% confidence interval.  
Values in bold are statistically significant ( $p < 0.05$ ).

244

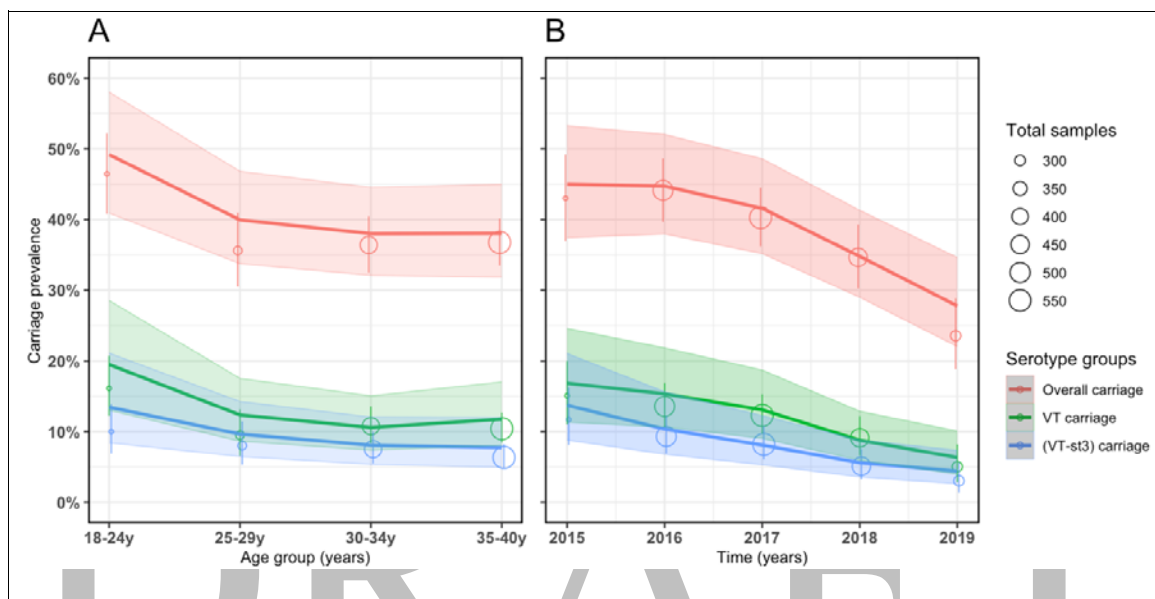

245

246 Figure 2. Observed and fitted pneumococcal carriage prevalence curves using data from rolling,  
247 prospective cross-sectional surveys in Blantyre, Malawi 2015-19. Number of carriage samples per age  
248 group between 18 to 40 years (y) and survey time from 2015 to 2019 represented by open circles  
249 radius proportion to total sample size with corresponding confidence intervals (vertical lines). P-spline  
250 GAM fitted lines and confidence intervals (ribbons) for the (A) age- and (B) time-dependent carriage  
251 prevalence stratified by overall carriage, vaccine serotypes (VT) carriage and VT carriage without  
252 serotype 3 (VT-st3).

253

### 254 **Factors associated with overall carriage prevalence**

255 Overall carriage prevalence was only independently associated with SES, with adults in low SES  
256 having 22% higher overall carriage than those in high SES (21.9, 95%CI 1.6, 43.7). In a sub-analysis  
257 with age and time-stratification, our model predicted that being a younger (18-24y) adult in low SES

258 or living with a child aged <5y was significantly associated with higher overall carriage prevalence.  
259 Significant associations with low SES and shorter ART duration were also seen with overall carriage .  
260 Overall carriage prevalence in younger adults was significantly higher by 42% for those in low vs  
261 high SES (41.8, 95%CI 12.5, 74.0) and 27% for those living with vs those living without a child <5y  
262 (27.2, 95%CI 0.4, 57.4). Temporally, overall carriage prevalence was persistently higher by 50% in  
263 2018 (49.5, 95%CI 13.4, 89.8) and 84% in 2019 (83.6, 95%CI 20.5, 167.4) in adults in the low vs  
264 high SES, and higher by 35% in 2015 (35.4, 95%CI 0.9, 77.2) and 131% in 2019 (130.8, 95%CI 43.2,  
265 255.4) in adults with shorter vs longer duration on ART (Table 2, Fig. 3, S1 Table).

266

### 267 **Factors associated with VT carriage prevalence**

268 Sex, SES, ART duration and living with a child <5y were not significantly associated with VT  
269 carriage prevalence. However, with age- and time-stratification, our model of VT carriage outcome  
270 predicted that being a younger (18-24y) or older (35-40y) adult living without a child <5y or being  
271 older male significantly increased VT carriage prevalence. Temporally, living without a child <5y  
272 remained a significant predictor of higher carriage prevalence in 2019. Living without vs with a child  
273 <5y significantly increased VT carriage prevalence by 67% in younger adults 67.1 (95%CI 10.7,  
274 140.5) and 41.0% in older adults (95%CI 1.5, 88.6). VT carriage prevalence was significantly higher  
275 in older males than females (50.0, 95%CI 7.2, 100.7; Table 2, Fig. 3, S1 Table).

276

Table 2. Risk factors for age- and time-dependent overall and VT with serotype 3 carriage prevalence, and the relative differences in the fitted carriage prevalence between the reference group and comparative groups among ALWHIV on ART, 2015-2019 in Blantyre, Malawi.

| Risk factors              | Overall % relative difference <sup>†</sup> (95% CI) | % Relative difference <sup>†</sup> in age-dependent carriage prevalence (95% CI) |                     |                     |                            | % Relative difference <sup>†</sup> in time-dependent carriage prevalence (95% CI) |                     |                     |                          |                              |
|---------------------------|-----------------------------------------------------|----------------------------------------------------------------------------------|---------------------|---------------------|----------------------------|-----------------------------------------------------------------------------------|---------------------|---------------------|--------------------------|------------------------------|
|                           |                                                     | 18-24y                                                                           | 25-29y              | 30-34y              | 35-40y                     | 2015                                                                              | 2016                | 2017                | 2018                     | 2019                         |
| Overall carriage          |                                                     |                                                                                  |                     |                     |                            |                                                                                   |                     |                     |                          |                              |
| Female vs male            | -4.8 (-20.9, 13.5)                                  | -18.1 (-35.7, 1.7)                                                               | 16.3 (-15.9, 57.2)  | 19.0 (-8.5, 52.9)   | -10.3 (-25.5, 6.8)         | -13.5 (-35.5, 12.7)                                                               | -6.1 (-23.9, 14.2)  | 7.1 (-14.5, 32.5)   | -12.9 (-33.8, 12.2)      | 16.8 (-27.4, 79.8)           |
| Low vs High SES           | <b>21.9 (1.6, 43.7)</b>                             | <b>41.8 (12.5, 74.0)</b>                                                         | 2.1 (-26.0, 32.9)   | 22.2 (-2.8, 49.2)   | 19.9 (-1.8, 42.9)          | 16.5 (-16.2, 52.2)                                                                | 19.3 (-5.4, 45.8)   | 26.7 (-0.1, 55.2)   | <b>49.5 (13.4, 89.8)</b> | <b>83.6 (20.5, 167.1)</b>    |
| ART <3y vs ART ≥3y        | 11.5 (-6.7, 31.5)                                   | 1.9 (-20.8, 28.4)                                                                | 4.7 (-23.9, 40.6)   | 4.4 (-15.7, 26.8)   | 19.9 (-0.4, 41.8)          | <b>35.4 (0.9, 77.2)</b>                                                           | 3.9 (-15.7, 25.3)   | -0.7 (-19.4, 19.9)  | 26.2 (-4.1, 61.4)        | <b>130.8 (43.2, 255.6)</b>   |
| With vs without child <5y | 9.7 (-0.8, 29.1)                                    | <b>27.2 (0.4, 57.4)</b>                                                          | 2.6 (-22.9, 31.8)   | 0.3 (-19.5, 22.1)   | 8.9 (-9.2, 28.5)           | 8.7 (-18.4, 39.5)                                                                 | 1.1 (-17.9, 22.2)   | 7.4 (-12.4, 29.4)   | 13.8 (-14.3, 44.7)       | -7.6 (-41.8, 31.5)           |
| VT carriage               |                                                     |                                                                                  |                     |                     |                            |                                                                                   |                     |                     |                          |                              |
| Female vs male            | -18.6 (-64.9, 53.7)                                 | -16.6 (-51.2, 28.6)                                                              | 26.8 (-42.8, 146.6) | -5.1 (-47.8, 59.1)  | <b>-33.3 (-55.6, -5.8)</b> | -21.4 (-58.3, 31.3)                                                               | -18.0 (-48.9, 22.5) | -13.3 (-47.6, 33.1) | 1.1 (-54.4, 92.7)        | 40.3 (-72.9, 315.5)          |
| Low vs High SES           | 6.0 (-61.0, 91.2)                                   | -26.5 (-67.6, 19.6)                                                              | 12.5 (-46.6, 85.4)  | 23.8 (-32.4, 90.8)  | 35.8 (-14.5, 93.2)         | 17.7 (-47.0, 94.6)                                                                | -3.2 (-48.7, 47.9)  | 17.6 (-38.2, 80.9)  | 37.3 (-39.2, 133.2)      | 53.1 (-48.0, 229.5)          |
| ART <3y vs ART ≥3y        | 0.0 (-55.1, 77.4)                                   | -14.5 (-49.6, 32.3)                                                              | -15.3 (-63.7, 65.3) | 33.7 (-19.3, 102.1) | -2.9 (-36.4, 35.0)         | 32.7 (-26.2, 114.5)                                                               | -6.9 (-42.9, 36.2)  | -21.9 (-51.5, 13.6) | 1.0 (-49.2, 67.6)        | 54.4 (-53.7, 255.6)          |
| With vs without child <5y | 33.1 (-40.9, 142.5)                                 | <b>-40.2 (-64.7, -9.9)</b>                                                       | -6.6 (-52.3, 54.3)  | 8.6 (-36.6, 67.6)   | <b>-29.1 (-52.8, -0.5)</b> | 7.7 (-43.3, 73.9)                                                                 | 26.9 (-21.2, 89.1)  | 50.4 (-6.0, 125.0)  | 4.5 (-55.1, 78.6)        | <b>-84.8 (-108.2, -57.4)</b> |

<sup>†</sup> Relative difference was computed by subtracting a GAM carriage prevalence estimate of the reference category from the comparator category and then dividing the absolute difference by the reference category then multiplied by 100%.

ART: Antiretroviral therapy, ALWHIV: adults living with human immunodeficiency virus, CI: confidence intervals, y: year, SES: Social Economic Status score based a possession index which is calculated as a sum of positive responses for household ownership of each of the fifteen different functioning items such as watch, radio, bank account, iron (charcoal), sewing machine (electric), mobile phone, CD player, fan (electric), bednet, mattress, bed, bicycle, motorcycle, car, and television. Middle and high SES were combined and named as high SES.

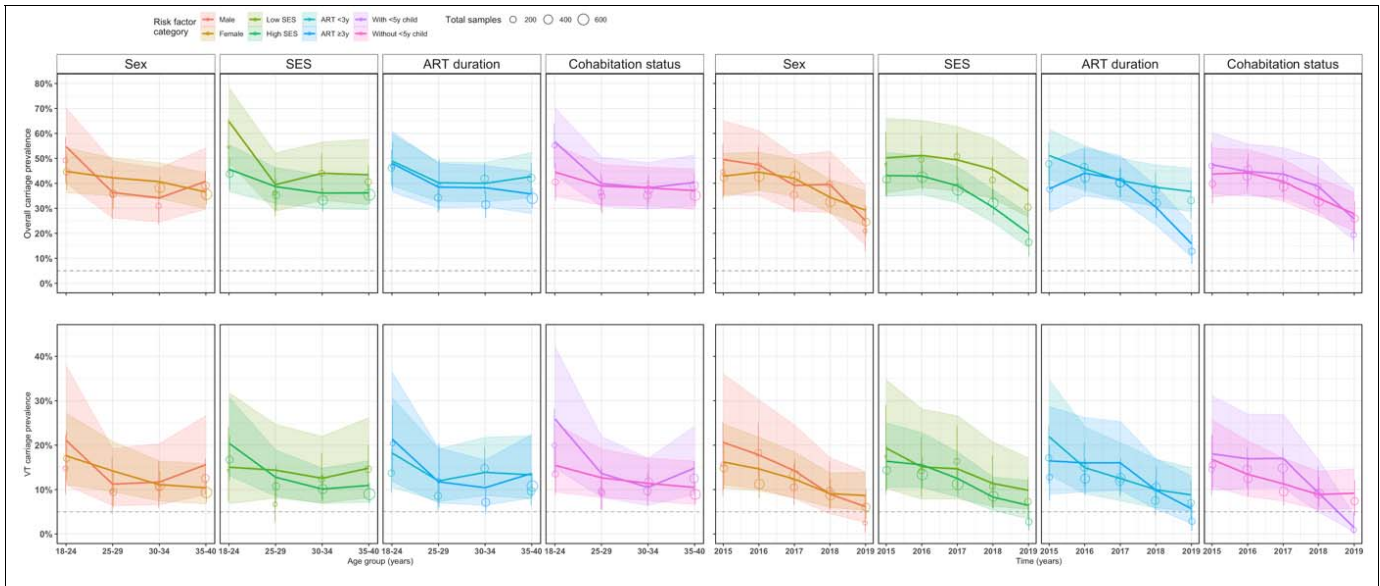

278

279 Figure 3. P-spline generalised additive model: Observed and fitted pneumococcal carriage prevalence  
280 curves for each potential risk factor category using data from rolling, prospective cross-sectional  
281 surveys in Blantyre, Malawi 2015-19. Nasopharyngeal samples across age groups from 18 to 40 years  
282 (y) and time represented by open circles. Circle radius is proportional to total sample size with  
283 corresponding confidence intervals (vertical lines). The coloured lines show P-spline GAM fitted  
284 model and confidence intervals for age- and time-dependent carriage prevalence for overall carriage  
285 (plots from first row) and vaccine serotypes (VT) carriage (plots from second row) stratified by risk  
286 factor categories.

287

## 288 Discussion

289 We used generalised additive models to estimate age- and time-dependent overall (VT+NVT) and VT  
290 pneumococcal carriage prevalence and related risk factors in ALWHIV on ART. We analysed overall  
291 and VT carriage separately to take into account the effect of a high uptake infant PCV13 programme  
292 <sup>42</sup>. Overall and VT carriage declined with increasing age group and time, with VT carriage having a  
293 faster decline (faster still if serotype 3 was excluded from VT). Our models predicted higher overall  
294 carriage prevalence in younger adults from low SES and living with a child <5y, as well as those with  
295 shorter duration on ART. Conversely, VT carriage prevalence was predominantly high in older males,  
296 and younger and older adults not living with a child <5y. These findings suggest that the decline in  
297 VT carriage prevalence across time in ALWHIV on ART is in part due to VT indirect protection from  
298 vaccinated younger children, although it is imperfect in males or adults not living with younger  
299 children, who may potentially have different routes of pneumococcal acquisition outside the  
300 household. Reduction in overall carriage suggests a combined effect of infant PCV13 vaccination and  
301 widespread use of antibiotics (i.e. cotrimoxazole) among adults in this setting.

302  
303 Our analysis of risk factors for persistent carriage in ALWHIV on ART in the post PCV13  
304 introduction era in urban Blantyre extends our previous observations that focussed mainly on high  
305 residual VT carriage and its determinants in PCV13-vaccinated and unvaccinated children <sup>15,16</sup>. We  
306 now show substantially high overall and VT carriage prevalence in ALWHIV during the earlier (45%  
307 and 17%) than later (28% and 7%) years post infant-PCV13 introduction. VT carriage declined faster  
308 than overall carriage, suggesting cumulative vaccine-induced community-level indirect protection  
309 from infant PCV vaccination <sup>43-45</sup>. The temporal reduction in VT carriage prevalence was even more  
310 marked when serotype 3 was excluded (and included as NVT), supporting accumulating evidence of  
311 the reduced effectiveness of PCV13 against serotype 3 <sup>36,37</sup>.

312

313 Higher overall and VT carriage prevalences among younger than older adults reported in this study  
314 may suggest distinct high carriage acquisition risk in younger adults, partly supported by recent  
315 evidence of higher rates of skin-to-skin contacts between younger adults and with other age groups in



316 urban Blantyre<sup>46</sup>. The shorter median duration on ART amongst the younger adults as shown in S6  
317 Fig may contribute to this residual pneumococcal carriage through incomplete immune reconstitution  
318 at both the systemic and mucosal level<sup>27,47,48</sup>.

319

320 Low SES neighbourhoods in urban Blantyre predominantly comprise high-density informal  
321 settlements, relatively larger households and low rates of formal employment<sup>28</sup>. Thus, substantial  
322 overall carriage prevalence in younger adults from low SES suggests that factors associated with low  
323 SES such as poorly ventilated and overcrowded houses with intense social contacts are reservoirs for  
324 pneumococcal carriage in the PCV13 era<sup>16,28,46,49</sup>. On the contrary, non-differential VT carriage  
325 prevalence by household SES underlines an important role PCV vaccination plays to outweigh  
326 infection risks in poor settings. We uncover a phenomenon where adults living with children <5y,  
327 mostly PCV13 recipients given the high (>90%) infant PCV13 vaccination coverage<sup>15</sup>, have  
328 substantially lower VT but higher overall carriage prevalence suggesting some non-vaccine serotype  
329 (NVT) replacement in adults within households, in line with evidence from rural Malawi and South  
330 Africa<sup>50,51</sup>.

331

332 In this setting, VT carriage prevalence was higher in older male than female adults. VT carriage  
333 acquisition between mothers and their infants has been demonstrated previously in Malawi and South  
334 Africa prior to infant-PCV introduction<sup>20,21</sup>. Thus, our finding aligns with recent evidence in the same  
335 setting showing strong intergenerational social mixing patterns between females and their potentially  
336 PCV13-vaccinated younger children likely through parental or guardian roles<sup>46</sup>. This suggests that in  
337 the infant-PCV13 era, interruption of VT carriage transmission likely favors females than males.

338

339 Overall and VT carriage prevalence in ALWHIV on ART are heterogenous by age such that  
340 epidemiological models for carriage that incorporate ALWHIV should stratify for age for precise  
341 estimations. Our findings have policy implications in sub-Saharan African populations affected by  
342 HIV as persistent VT carriage in ALWHIV may imply continued risk of VT-IPD<sup>14</sup>. The indirect  
343 impact on VT carriage of alternative infant-PCV13 vaccine strategies, including 2 primary doses with



344 a booster dose or double booster doses (i.e. 2+1 or 2+1+1), currently being tested to improve the  
345 control of childhood disease, should also be further evaluated in ALWHIV<sup>18</sup>. Indeed the 2+1  
346 schedule, as implemented in South Africa, has generated indirect protection against IPD in  
347 unvaccinated older children and ALWHIV<sup>44,52</sup>. However, simply improving control of carriage in  
348 young children to indirectly protect vulnerable immunocompromised adults may be insufficient,  
349 particularly in the context of a high local force of infection and a rapid waning of vaccine-induced  
350 immunity<sup>16,53</sup>. Furthermore, we provide evidence of heterogeneity in VT carriage prevalence with  
351 males or adults living without <5y child in their homes being at highest risk of VT carriage in the  
352 PCV era. Together, these data add weight to our viewpoint that as with many people living in high-  
353 income countries, targeted-pneumococcal vaccination should be considered in ALWHIV in LMICs.

354

355 We used a robust dataset with adequate samples to compute estimates for the overall, VT and risk  
356 factor-dependent carriage prevalence. Nonetheless, there were some limitations to our work, including  
357 limited data on risk factors such as viral load, use of tobacco, presence of other chronic co-  
358 morbidities, adherence to ART and history of antibiotics, which may independently influence carriage  
359 dynamics<sup>54</sup>. In addition, latex agglutination method used in the main analysis for single serotype  
360 detection could underestimate our current prevalence estimates as compared to a more sensitive  
361 microarray method for multiple serotype detection as show in S2 Fig. Finally, the systematic  
362 recruitment of ALWHIV may be prone to bias if a cyclical pattern (unnoticeable here) is present in  
363 the important characteristics of the individuals as they attend the ART clinic<sup>55</sup>.

364

365 In conclusion, despite temporal reductions in overall pneumococcal carriage, the risk of VT carriage  
366 and therefore subsequent pneumococcal disease remains high in ALWHIV. Efficient infant PCV  
367 schedules that enhance indirect protection together with targeted-vaccination for ALWHIV should be  
368 considered, along with other public health measures to further reduce VT carriage and disease. These  
369 measures should be supported by robust surveillance to assess effectiveness and identify early  
370 evidence of vaccine escape.

## 371 **Acknowledgements**

372 We thank the individuals who participated in this study and the local authorities for their support. We  
373 are grateful to the study field teams (supported by Farouck Bonomali and Roseline Nyirenda). We are  
374 grateful to the hospitality of the QECH ART Clinic, led by Ken Malisita. Our thanks also extend to  
375 the MLW laboratory management team (led by Brigitte Denis) and the MLW data management team  
376 (led by the late Clemens Masesa whose contribution we wish to particularly acknowledge). DT, KCJ,  
377 JO, SF NF, RSH, and TDS are supported by the National Institute for Health and Care Research  
378 (NIHR) Global Health Research Unit on Mucosal Pathogens and RSH is a NIHR Senior Investigator.  
379 The views expressed in this publication are those of the authors and not necessarily those of the NIHR  
380 or the Department of Health and Social Care. The MLW Programme is supported by a Strategic  
381 Award from the Wellcome, UK

## 382 **Author contributions**

383 Conceptualization; DT, SF, NF, TDS, RSH

384 Data curation; DT, TDS, TM

385 Formal analysis; DT, SF

386 Funding acquisition; NF, RSH, TDS

387 Investigation; DT, TM, AK, JM, CB, TDS

388 Methodology; DT, SF

389 Project administration; TM, AK, JM, CB, CM, NF, RSH, TDS

390 Resources; NF, RSH, TDS

391 Software; DT

392 Supervision; SF, NF, KCJ, TDS

393 Validation; DT, TM, KCJ, AK, JM, CB, CM, JO, SF, NF, RSH, TDS

394 Visualization; DT

395 Writing – original draft; DT

396 Writing - review & editing; DT, TM, KCJ, AK, JM, CB, CM, JO, SF, NF, RSH, TDS

397 All authors read and approved the final manuscript.

398

### 399 **Data availability**

400 An R script that was used to analyse the datasets is available in the GitHub repository <sup>41</sup>.

401

### 402 **Competing interests**

403 The authors declare no competing interests.

404

### 405 **Role of the funding source**

406 A project grant jointly funded by the UK Medical Research Council (MRC) and the UK Department  
407 for International Development (DFID) under the MRC/DFID Concordat agreement, also as part of the  
408 EDCTP2 programme supported by the European Union (Grant MR/N023129/1); and a recruitment  
409 award from the Wellcome (Grant 106846/Z/15/Z). The MLW Programme is supported by a Strategic  
410 Award from the Wellcome, UK. The National Institute for Health and Care Research (NIHR) Global  
411 Health Research Unit on Mucosal Pathogens is supported using UK aid from the UK Government  
412 (Grant 16/136/46). SF is also supported by a Sir Henry Dale Fellowship jointly funded by the  
413 Wellcome Trust and the Royal Society (Grant 208812/Z/17/Z). The views expressed in this  
414 publication are those of the author(s) and not necessarily those of the NIHR or the Department of  
415 Health and Social Care. The funders had no role in study design, collection, analysis, data  
416 interpretation, writing of the report or in the decision to submit the paper for publication. The  
417 corresponding author and senior authors had full access to the study data, and together, had final  
418 responsibility for the decision to submit for publication.

419

## 420 **References**

- 421 1. WHO. *WHO Pneumococcus vaccines position paper*. 85–104  
422 [https://www.who.int/immunization/policy/position\\_papers/pneumococcus/en/](https://www.who.int/immunization/policy/position_papers/pneumococcus/en/) (2019).
- 423 2. Simell, B. *et al.* The fundamental link between pneumococcal carriage and disease. *Expert*  
424 *Review of Vaccines* **11**, 841–855 (2012).
- 425 3. Bar-Zeev, N., Mtunthama, N., Gordon, S. B., Mwafulirwa, G. & French, N. Minimum Incidence  
426 of Adult Invasive Pneumococcal Disease in Blantyre, Malawi an Urban African Setting: A  
427 Hospital Based Prospective Cohort Study. *PLOS ONE* **10**, e0128738 (2015).
- 428 4. Meiring, S. *et al.* HIV Infection and the Epidemiology of Invasive Pneumococcal Disease (IPD)  
429 in South African Adults and Older Children Prior to the Introduction of a Pneumococcal  
430 Conjugate Vaccine (PCV). *PLOS ONE* **11**, e0149104 (2016).
- 431 5. Corcoran, M. *et al.* The epidemiology of invasive pneumococcal disease in older adults in the  
432 post-PCV era. Has there been a herd effect? *Epidemiology & Infection* **145**, 2390–2399 (2017).
- 433 6. Dwyer-Lindgren, L. *et al.* Mapping HIV prevalence in sub-Saharan Africa between 2000 and  
434 2017. *Nature* **570**, 189 (2019).
- 435 7. Frank, T. D. *et al.* Global, regional, and national incidence, prevalence, and mortality of HIV,  
436 1980–2017, and forecasts to 2030, for 195 countries and territories: a systematic analysis for the  
437 Global Burden of Diseases, Injuries, and Risk Factors Study 2017. *The Lancet HIV* **6**, e831–e859  
438 (2019).
- 439 8. Choko, A. T. *et al.* Uptake, Accuracy, Safety, and Linkage into Care over Two Years of  
440 Promoting Annual Self-Testing for HIV in Blantyre, Malawi: A Community-Based Prospective  
441 Study. *PLOS Medicine* **12**, e1001873 (2015).
- 442 9. van Aalst, M. *et al.* Incidence of invasive pneumococcal disease in immunocompromised  
443 patients: A systematic review and meta-analysis. *Travel Medicine and Infectious Disease* **24**, 89–  
444 100 (2018).
- 445 10. Harries, A., Makombe, S., Libamba, E. & Schouten, E. Why Did the Scale-up of HIV Treatment  
446 Work?: A Case Example From Malawi. *J AIDS Journal of Acquired Immune Deficiency Syndromes*  
447 **57**, (2011).

- 448 11. Harries, A. D. *et al.* Act local, think global: how the Malawi experience of scaling up  
449 antiretroviral treatment has informed global policy. *BMC Public Health* **16**, 938 (2016).
- 450 12. Jahn, A. *et al.* Scaling-up antiretroviral therapy in Malawi. *Bulletin of the World Health*  
451 *Organization* **94**, 772–776 (2016).
- 452 13. VACFA. Immunization Schedules - Africa | Vaccines for Africa.  
453 <http://www.vacfa.uct.ac.za/immunization-schedules-africa> (2018).
- 454 14. Bar-Zeev, N. *et al.* Impact and effectiveness of 13-valent pneumococcal conjugate vaccine on  
455 population incidence of vaccine and non-vaccine serotype invasive pneumococcal disease in  
456 Blantyre, Malawi, 2006–18: prospective observational time-series and case-control studies. *The*  
457 *Lancet Global Health* **9**, e989–e998 (2021).
- 458 15. Swarthout, T. D. *et al.* High residual carriage of vaccine-serotype *Streptococcus pneumoniae* after  
459 introduction of pneumococcal conjugate vaccine in Malawi. *Nature Communications* **11**, 2222  
460 (2020).
- 461 16. Lourenço, J. *et al.* Determinants of high residual post-PCV13 pneumococcal vaccine-type  
462 carriage in Blantyre, Malawi: a modelling study. *BMC Medicine* **17**, (2019).
- 463 17. Klugman, K. P. & Rodgers, G. L. Population versus individual protection by pneumococcal  
464 conjugate vaccination. *The Lancet* **393**, 2102–2104 (2019).
- 465 18. Thindwa, D. *et al.* Vaccine strategies to reduce the burden of pneumococcal disease in HIV-  
466 infected adults in Africa. *Expert Review of Vaccines* **0**, 1–8 (2020).
- 467 19. WHO | Pneumococcal conjugate 3rd dose (PCV3) immunization coverage. *WHO*  
468 <http://www.who.int/gho/immunization/pneumococcal/en/> (2019).
- 469 20. Shiri, T. *et al.* Dynamics of Pneumococcal Transmission in Vaccine-Naïve Children and Their  
470 HIV-infected or HIV-uninfected Mothers During the First 2 Years of Life. *Am J Epidemiol* **178**,  
471 1629–1637 (2013).
- 472 21. Heinsbroek, E. *et al.* Pneumococcal Acquisition Among Infants Exposed to HIV in Rural  
473 Malawi: A Longitudinal Household Study. *Am J Epidemiol* **183**, 70–78 (2016).

- 474 22. le Polain de Waroux, O. *et al.* Characteristics of human encounters and social mixing patterns  
475 relevant to infectious diseases spread by close contact: a survey in Southwest Uganda. *BMC*  
476 *Infectious Diseases* **18**, 172 (2018).
- 477 23. le Polain de Waroux, O. *et al.* Identifying human encounters that shape the transmission of  
478 *Streptococcus pneumoniae* and other acute respiratory infections. *Epidemics* **25**, 72–79 (2018).
- 479 24. Neal, E. F. G. *et al.* Factors associated with pneumococcal carriage and density in children and  
480 adults in Fiji, using four cross-sectional surveys. *PLOS ONE* **15**, e0231041 (2020).
- 481 25. Neal, E. F. G. *et al.* Associations between ethnicity, social contact, and pneumococcal carriage  
482 three years post-PCV10 in Fiji. *Vaccine* **38**, 202–211 (2020).
- 483 26. Heinsbroek, E. *et al.* Persisting high prevalence of pneumococcal carriage among HIV-infected  
484 adults receiving antiretroviral therapy in Malawi. *Aids* **29**, 1837–1844 (2015).
- 485 27. Glennie, S. J. *et al.* Defective Pneumococcal-Specific Th1 Responses in HIV-Infected Adults  
486 Precedes a Loss of Control of Pneumococcal Colonization. *Clin Infect Dis* **56**, 291–299 (2013).
- 487 28. National Statistical Office Malawi. *Malawi Population and Housing Census 2018*. 1–311  
488 [http://www.nsomalawi.mw/index.php?option=com\\_content&view=article&id=3](http://www.nsomalawi.mw/index.php?option=com_content&view=article&id=3D226:2018-malawi-population-and-housing-census&catid=E2%80%89%3D%E2%80%89:reports&Itemid=E2%80%89%3D%E2%80%89%896)  
489 [D226:2018-malawi-population-and-housing-](http://www.nsomalawi.mw/index.php?option=com_content&view=article&id=3D226:2018-malawi-population-and-housing-census&catid=E2%80%89%3D%E2%80%89:reports&Itemid=E2%80%89%3D%E2%80%89%896)  
490 [census&catid=E2%80%89%3D%E2%80%89:reports&Itemid=E2%80%89%3D%E2%80](http://www.nsomalawi.mw/index.php?option=com_content&view=article&id=3D226:2018-malawi-population-and-housing-census&catid=E2%80%89%3D%E2%80%89:reports&Itemid=E2%80%89%3D%E2%80%89%896)  
491 [%896](http://www.nsomalawi.mw/index.php?option=com_content&view=article&id=3D226:2018-malawi-population-and-housing-census&catid=E2%80%89%3D%E2%80%89:reports&Itemid=E2%80%89%3D%E2%80%89%896) (2019).
- 492 29. Ministry of Health. *Malawi Guidelines for Clinical Management of HIV in Children and Adults*.  
493 1–128  
494 [https://differentiatedservicedelivery.org/Portals/0/adam/Content/yb4xSSLvE0SW98\\_z7wTm\\_w/](https://differentiatedservicedelivery.org/Portals/0/adam/Content/yb4xSSLvE0SW98_z7wTm_w/File/Malawi%20Clinical%20HIV%20Guidelines%202018%20(1).pdf)  
495 [File/Malawi%20Clinical%20HIV%20Guidelines%202018%20\(1\).pdf](https://differentiatedservicedelivery.org/Portals/0/adam/Content/yb4xSSLvE0SW98_z7wTm_w/File/Malawi%20Clinical%20HIV%20Guidelines%202018%20(1).pdf) (2018).
- 496 30. Satzke, C. *et al.* Standard method for detecting upper respiratory carriage of *Streptococcus*  
497 *pneumoniae*: Updated recommendations from the World Health Organization Pneumococcal  
498 Carriage Working Group. *Vaccine* **32**, 165–179 (2013).
- 499 31. Newton, R., Hinds, J. & Wernisch, L. Empirical Bayesian models for analysing molecular  
500 serotyping microarrays. *BMC Bioinformatics* **12**, 88 (2011).

- 501 32. Swarthout, T. D. *et al.* Evaluation of Pneumococcal Serotyping of Nasopharyngeal-Carriage  
502 Isolates by Latex Agglutination, Whole-Genome Sequencing (PneumoCaT), and DNA  
503 Microarray in a High-Pneumococcal-Carriage-Prevalence Population in Malawi. *Journal of*  
504 *Clinical Microbiology* **59**, (2020).
- 505 33. Kamng'ona, A. W. *et al.* High multiple carriage and emergence of *Streptococcus pneumoniae*  
506 vaccine serotype variants in Malawian children. *BMC Infectious Diseases* **15**, 234 (2015).
- 507 34. Stekhoven, D. J. & Bühlmann, P. MissForest—non-parametric missing value imputation for  
508 mixed-type data. *Bioinformatics* **28**, 112–118 (2012).
- 509 35. Eilers, P. H. C. & Marx, B. D. Flexible Smoothing with B-splines and Penalties. *Statistical*  
510 *Science* **11**, 89–102 (1996).
- 511 36. Linley, E., Bell, A., Gritzfeld, J. F. & Borrow, R. Should Pneumococcal Serotype 3 Be Included  
512 in Serotype-Specific Immunoassays? *Vaccines* **7**, 4 (2019).
- 513 37. Usuf, E. *et al.* Persistence of Nasopharyngeal Pneumococcal Vaccine Serotypes and Increase of  
514 Nonvaccine Serotypes Among Vaccinated Infants and Their Mothers 5 Years After Introduction  
515 of Pneumococcal Conjugate Vaccine 13 in The Gambia. *Clin Infect Dis* **68**, 1512–1521 (2019).
- 516 38. Hens, N. *et al.* *Modeling Infectious Disease Parameters Based on Serological and Social Contact*  
517 *Data: A Modern Statistical Perspective*. (Springer Science & Business Media, 2012).
- 518 39. Kohavi, R., Longbotham, R., Sommerfield, D. & Henne, R. M. Controlled experiments on the  
519 web: survey and practical guide. *Data Min Knowl Disc* **18**, 140–181 (2009).
- 520 40. R Core Team (2018). R: A language and environment for statistical computing. R Foundation for  
521 Statistical Computing, Vienna, Austria. <https://www.r-project.org/>.
- 522 41. Thindwa, D. R code and data for Age- and time-dependent risk factors for pneumococcal carriage  
523 in HIV-positive adults on ART in the infant PCV era in Blantyre, Malawi.  
524 <https://github.com/deusthindwa/Pneumo.carriage.adults.hiv.malawi> (2021).
- 525 42. Mvula, H. *et al.* Predictors of Uptake and Timeliness of Newly Introduced Pneumococcal and  
526 Rotavirus Vaccines, and of Measles Vaccine in Rural Malawi: A Population Cohort Study. *PLOS*  
527 *ONE* **11**, e0154997 (2016).

- 528 43. Nzenze, S. A. M. C. *et al.* Temporal Changes in Pneumococcal Colonization in a Rural African  
529 Community With High HIV Prevalence Following Routine Infant Pneumococcal Immunization.  
530 *Journal* **32**, 1270–1278 (2013).
- 531 44. Nzenze, S. A. *et al.* Imputing the Direct and Indirect Effectiveness of Childhood Pneumococcal  
532 Conjugate Vaccine Against Invasive Pneumococcal Disease by Surveying Temporal Changes in  
533 Nasopharyngeal Pneumococcal Colonization. *Am J Epidemiol* **186**, 435–444 (2017).
- 534 45. Roca, A. *et al.* Effects of Community-Wide Vaccination with PCV-7 on Pneumococcal  
535 Nasopharyngeal Carriage in The Gambia: A Cluster-Randomized Trial. *PLOS Medicine* **8**,  
536 e1001107 (2011).
- 537 46. Thindwa, D. *et al.* *Social mixing patterns relevant to infectious diseases spread by close contact*  
538 *in urban Blantyre, Malawi.* 2021.12.16.21267959  
539 <https://www.medrxiv.org/content/10.1101/2021.12.16.21267959v1> (2021)  
540 doi:10.1101/2021.12.16.21267959.
- 541 47. Glennie, S. J. *et al.* Impaired CD4 T cell memory response to *Streptococcus pneumoniae* precedes  
542 CD4 T cell depletion in HIV-infected Malawian adults. *PLoS ONE* **6**, e25610 (2011).
- 543 48. Zhang, L. *et al.* Humoral immune responses to *Streptococcus pneumoniae* in the setting of HIV-1  
544 infection. *Vaccine* **33**, 4430–4436 (2015).
- 545 49. Dherani, M., Heinsbroek, E., Tafatatha, T., Chartier, R. & Bruce, N. Household Air Pollution and  
546 Pneumococcal Carriage in 6 Months Old Children in Malawi – MSCAPE Study. *ISEE*  
547 *Conference Abstracts* (2018) doi:10.1289/isee.2017.2017-558.
- 548 50. Heinsbroek, E. *et al.* Pneumococcal carriage in households in Karonga District, Malawi, before  
549 and after introduction of 13-valent pneumococcal conjugate vaccination. *Vaccine* **36**, 7369–7376  
550 (2018).
- 551 51. Cohen, C. *et al.* Effectiveness of the 13-valent pneumococcal conjugate vaccine against invasive  
552 pneumococcal disease in South African children: a case-control study. *The Lancet Global Health*  
553 **5**, e359–e369 (2017).



- 554 52. Madhi, S. A. & Nunes, M. C. The potential impact of pneumococcal conjugate vaccine in Africa:  
555 Considerations and early lessons learned from the South African experience. *Human Vaccines &*  
556 *Immunotherapeutics* **12**, 314–325 (2016).
- 557 53. Flasche, S., Lipsitch, M., Ojal, J. & Pinsent, A. Estimating the contribution of different age strata  
558 to vaccine serotype pneumococcal transmission in the pre vaccine era: a modelling study. *BMC*  
559 *Medicine* **18**, (2020).
- 560 54. Thindwa, D. *et al.* Estimating the contribution of HIV-infected adults to household pneumococcal  
561 transmission in South Africa, 2016–2018: A hidden Markov modelling study. *PLOS*  
562 *Computational Biology* **17**, e1009680 (2021).
- 563 55. PHAST. Methods of sampling from a population. *Health Knowledge*  
564 [https://www.healthknowledge.org.uk/public-health-textbook/research-methods/1a-](https://www.healthknowledge.org.uk/public-health-textbook/research-methods/1a-epidemiology/methods-of-sampling-population)  
565 [epidemiology/methods-of-sampling-population](https://www.healthknowledge.org.uk/public-health-textbook/research-methods/1a-epidemiology/methods-of-sampling-population) (2010).

566

DRAFT
